# Supplementary material for: Inhibition of EGFR, HER2, and HER3 signalling in patients with colorectal cancer wild-type for BRAF, PIK3CA, KRAS, and NRAS (FOCUS4-D): a phase 2–3 randomised trial
Source: PubMed Central journal article supplement (PMC6125825; doi:10.1016/s2468-1253(17)30394-1), 2017-12-16
Supplement: mmc1.pdf [file mmc1.pdf]

# THE LANCET

## Gastroenterology & Hepatology

### Supplementary appendix

This appendix formed part of the original submission and has been peer reviewed. We post it as supplied by the authors.

Supplement to: Adams R, Brown E, Brown L, et al, on behalf of the FOCUS4 Trial Investigators. Inhibition of EGFR, HER2, and HER3 signalling in patients with colorectal cancer wild-type for *BRAF*, *PIK3CA*, *KRAS*, and *NRAS* (FOCUS4-D): a phase 2–3 randomised trial. *Lancet Gastroenterol Hepatol* 2017; published online Dec 15. [http://dx.doi.org/10.1016/S2468-1253\(17\)30394-1](http://dx.doi.org/10.1016/S2468-1253(17)30394-1).

**Table: Toxicities by randomised group, according to NCI CTC version 3.0**

|                            | Placebo          |                  | AZD8931           |                   |
|----------------------------|------------------|------------------|-------------------|-------------------|
|                            | G1/2             | G3               | G1/2              | G3                |
| Nausea                     | 4 (25%)          | 0 (0%)           | 4 (27%)           | 0 (0%)            |
| Vomiting                   | 1 (6%)           | 0 (0%)           | 4 (27%)           | 0 (0%)            |
| <b>Diarrhoea</b>           | <b>4 (25%)</b>   | <b>1 (6%)</b>    | <b>11 (73%)</b>   | <b>1 (7%)</b>     |
| Stomatitis                 | 0 (0%)           | 0 (0%)           | 4 (27%)           | 0 (0%)            |
| Dry skin                   | 2 (13%)          | 0 (0%)           | 9 (60%)           | 0 (0%)            |
| <b>Skin rash</b>           | <b>3 (19%)</b>   | <b>0 (0%)</b>    | <b>11 (73%)</b>   | <b>3 (20%)</b>    |
| Acne                       | 4 (25%)          | 0 (0%)           | 7 (47%)           | 0 (0%)            |
| PPE                        | 2 (13%)          | 0 (0%)           | 4 (27%)           | 0 (0%)            |
| <b>Anaemia</b>             | <b>6 (38%)</b>   | <b>0 (0%)</b>    | <b>6 (40%)</b>    | <b>1 (7%)</b>     |
| Neutropenia                | 2 (13%)          | 0 (0%)           | 2 (13%)           | 0 (0%)            |
| Thrombocytopenia           | 3 (19%)          | 0 (0%)           | 1 (7%)            | 0 (0%)            |
| <b>Hyperbilirubinaemia</b> | <b>1 (6%)</b>    | <b>0 (0%)</b>    | <b>3 (20%)</b>    | <b>1 (7%)</b>     |
| Transaminitis              | 0 (0%)           | 0 (0%)           | 4 (27%)           | 0 (0%)            |
| Hypomagnesaemia            | 1 (6%)           | 0 (0%)           | 2 (13%)           | 0 (0%)            |
| Cardiac toxicity           | 0 (0%)           | 0 (0%)           | 0 (0%)            | 0 (0%)            |
| Pneumonitis                | 0 (0%)           | 0 (0%)           | 1 (7%)            | 0 (0%)            |
| <b>Infection</b>           | <b>2 (13%)</b>   | <b>0 (0%)</b>    | <b>3 (20%)</b>    | <b>1 (7%)</b>     |
| <b>Dry eyes</b>            | <b>1 (6%)</b>    | <b>0 (0%)</b>    | <b>2 (13%)</b>    | <b>1 (7%)</b>     |
| Photophobia                | 1 (6%)           | 0 (0%)           | 1 (7%)            | 0 (0%)            |
| Blurred vision             | 0 (0%)           | 0 (0%)           | 4 (27%)           | 0 (0%)            |
| Conjunctivitis             | 0 (0%)           | 0 (0%)           | 1 (7%)            | 0 (0%)            |
| Corneal ulcer              | 0 (0%)           | 0 (0%)           | 0 (0%)            | 0 (0%)            |
| Fatigue                    | 7 (44%)          | 0 (0%)           | 12 (80%)          | 0 (0%)            |
| Paronychia                 | 0 (0%)           | 0 (0%)           | 3 (20%)           | 0 (0%)            |
| Epistaxis                  | 0 (0%)           | 0 (0%)           | 1 (7%)            | 0 (0%)            |
| Cystitis                   | 0 (0%)           | 0 (0%)           | 1 (7%)            | 0 (0%)            |
| <b>Total</b>               | <b>16 (100%)</b> | <b>16 (100%)</b> | <b>15* (100%)</b> | <b>15* (100%)</b> |

\* missing data for one patient in AZD8931 arm

N.B. No toxicities of CTC grade 4 or 5 were reported.
